# Supplementary material for: Femtomolar sensitivity of bisphenol A photoelectrochemical aptasensor induced by visible light-driven TiO2 nanoparticle-decorated nitrogen-doped graphene
Source: Royal Society of Chemistry journal article supplement (doi:10.1039/c6tb01414c), 2016-01-01
Supplement: c6tb01414c1.pdf [file c6tb01414c1.pdf]

## Electronic Supplementary Information

### **Femtomolar sensitivity of bisphenol A photoelectrochemical aptasensor based on TiO<sub>2</sub> nanocrystals decorated nitrogen doped graphene**

Lei Zhou,<sup>a</sup> Ding Jiang,<sup>b</sup> Xiaojiao Du,<sup>a</sup> Danyang Chen,<sup>a</sup> Jing Qian,<sup>b</sup> Qian Liu,<sup>b</sup> Nan

Hao,<sup>b</sup> Kun Wang<sup>\*b</sup>

<sup>a</sup> *Key Laboratory of Modern Agriculture Equipment and Technology, School of Chemistry and Chemical Engineering, Jiangsu University, Zhenjiang, 212013, P.R. China*

<sup>b</sup> *School of Food and Biological Engineering, Jiangsu University, Zhenjiang, 212013, P.R. China*

---

\*Corresponding author. Tel.: +86 511 88791800; fax: +86 511 88791708.

E-mail address: wangkun@ujs.edu.cn

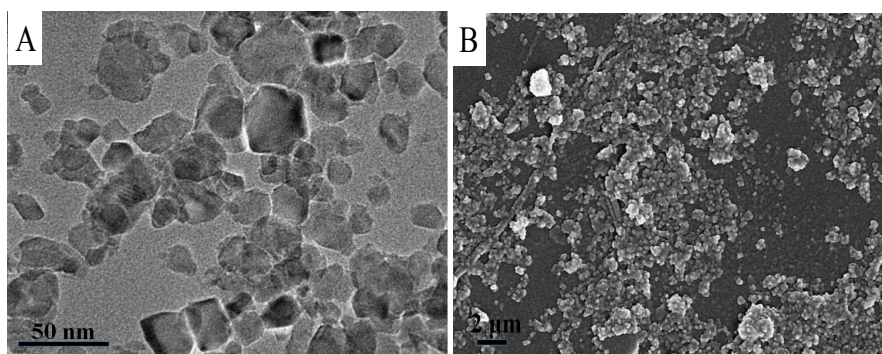

**Fig. S1** TEM image (A) of  $\text{TiO}_2$  and SEM image (B) of  $\text{TiO}_2$ .

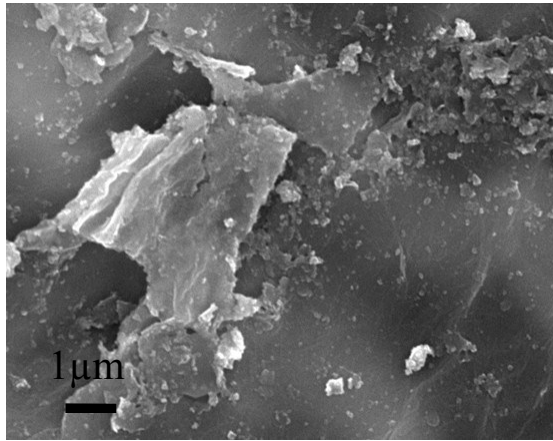

**Fig. S2** SEM image of TiO<sub>2</sub>/NG.

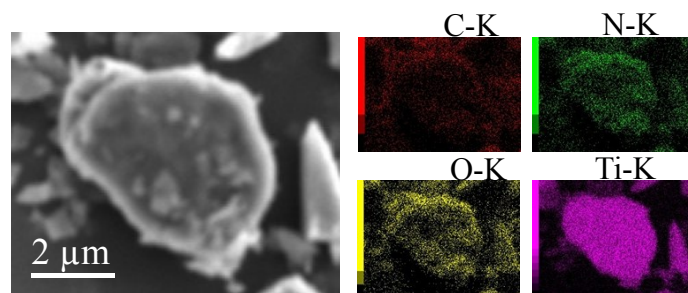

**Fig. S3** Corresponding SEM image of EDS mapping for TiO<sub>2</sub>/NG and elemental mapping of TiO<sub>2</sub>/NG.

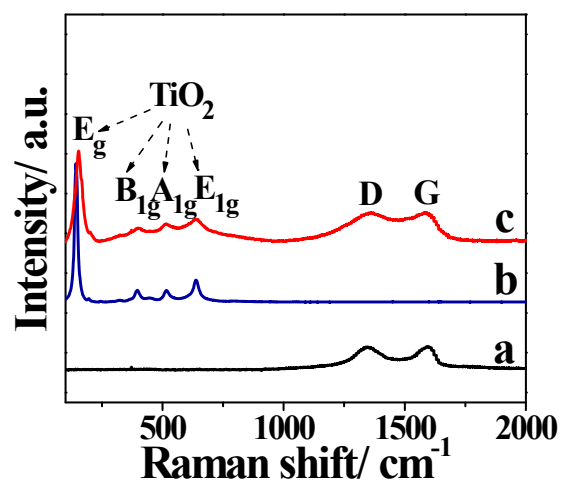

**Fig. S4** Raman spectra of (a) GO, (b) TiO<sub>2</sub>, and (c) TiO<sub>2</sub>/NG.

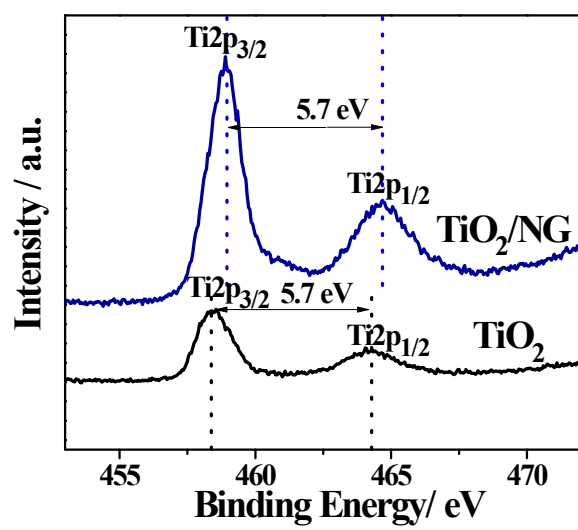

**Fig. S5** Ti 2p XPS spectrum of the TiO<sub>2</sub> and TiO<sub>2</sub>/NG.

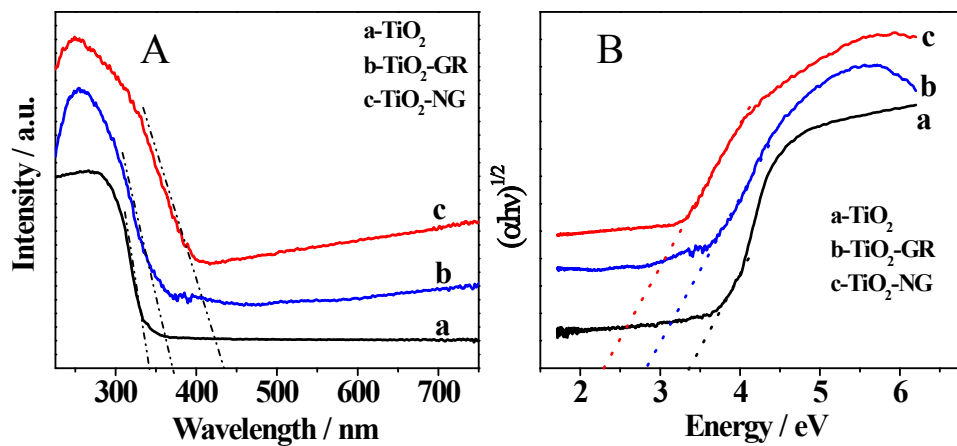

**Fig. S6** (A) UV-visible diffuse reflectance spectra (DRS) of TiO<sub>2</sub>, TiO<sub>2</sub>/GR and TiO<sub>2</sub>/NG. (B) Band gap of TiO<sub>2</sub>, TiO<sub>2</sub>/GR and TiO<sub>2</sub>/NG.

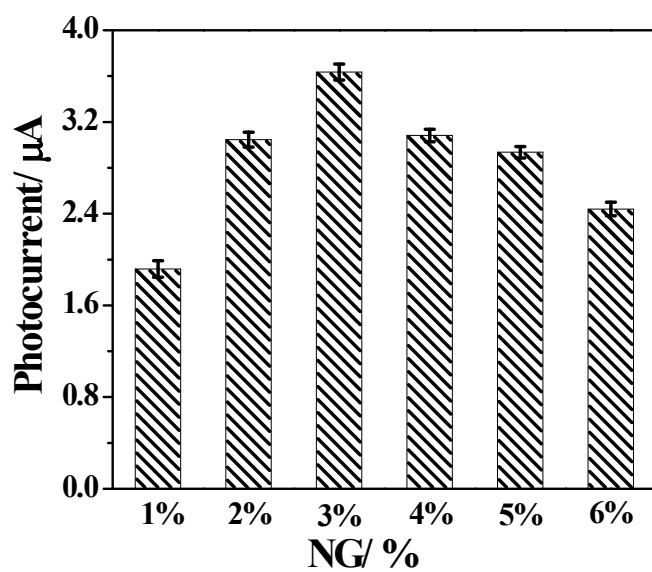

**Fig. S7** The photocurrent responses of 1%, 2%, 3%, 4%, 5% and 6% TiO<sub>2</sub>/NG/ITO electrodes recorded in PBS at a bias potential of +0.4V (vs SCE).



**Table S1** Comparison of different methods for detection BPA

| Method            | Linear range / M                              | Detection limit / M    | Reference |
|-------------------|-----------------------------------------------|------------------------|-----------|
| Colorimetry       | $1.1 \times 10^{-6}$ to $7.01 \times 10^{-5}$ | $5.8 \times 10^{-7}$   | 1         |
| ECL <sup>a</sup>  | $1 \times 10^{-9}$ to $1 \times 10^{-4}$      | $3 \times 10^{-10}$    | 2         |
| HPLC <sup>b</sup> | -                                             | $3.07 \times 10^{-12}$ | 3         |
| EIS <sup>c</sup>  | $1 \times 10^{-10}$ to $1 \times 10^{-8}$     | -                      | 4         |
| DPV <sup>d</sup>  | $5 \times 10^{-8}$ to $5.5 \times 10^{-5}$    | $1.2 \times 10^{-9}$   | 5         |
| PEC <sup>e</sup>  | $1 \times 10^{-12}$ to $1 \times 10^{-8}$     | $3 \times 10^{-13}$    | This work |

a ECL-electrochemiluminescence

b HPLC-high-performance liquid chromatographic

c EIS-electrochemical impedance spectroscopy

d DPV-differential pulse voltammetry

e PEC-photoelectrochemical

## References

- 1 X. S. Liang, H. B. Wang, H. Y. Wang and G. F. Pei, *Anal. Methods.*, 2015, **7**, 3952-3957.
- 2 H. Dai, S. P. Zhang, Y. Y. Lin, Y. Ma, L. S. Gong, G. F. Xu, M. Fu, X. H. Li and G. N. Chen, *Anal. Methods.*, 2014, **6**, 4746-4753.

3 T. Tanigawa, Y. Watabe, T. Kubo and K. Hosoya, *J. Sep. Sci.*, 2011, **34**, 2840-2846.

4 K. S. Kim, J. R. Jang, W. S. Choe and P. J. Yoo, *Biosens. Bioelectron.*, 2015, **71**, 214-221.

5 W. Y. Chen, L. P. Mei, J. J. Feng, T. Yuan, A. J. Wang, H. Y. Yu, *Microchim Acta.*, 2015, **182**, 703-709.
